# Supplementary material
Source: Springer Nature journal article supplement (https://www.springermedizin.de/resource/supplementary/12936_2012_2165_MOESM3_ESM.pdf/9542692)

Mae Sot, Thailand

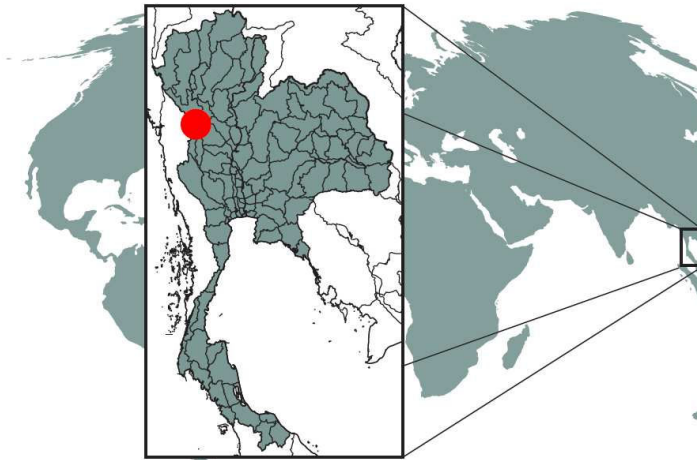

Leyte, Philippines

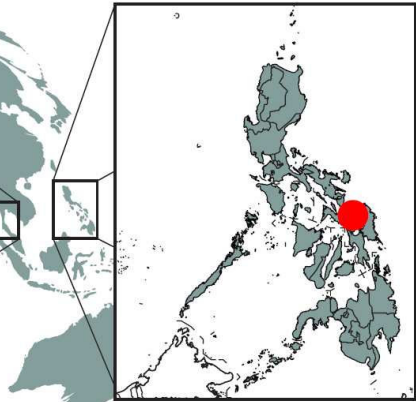

Basse Santa Su, The Gambia

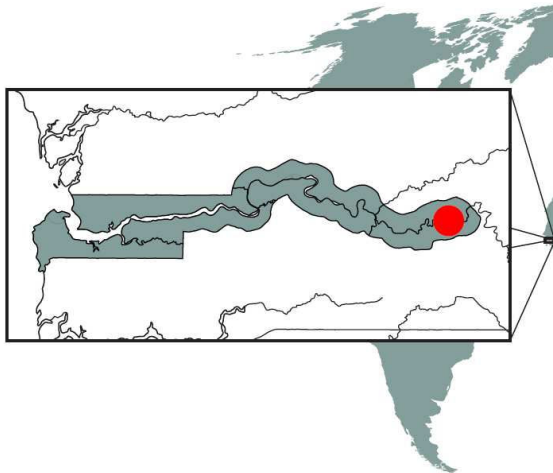

Magoda, Tanzania

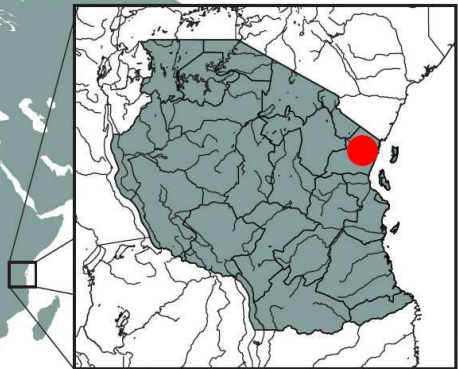

Supplement: MOESM3 [file 9542692]
